# Supplementary material for: Improving device performance of n-type organic field-effect transistorsviadoping with a p-type organic semiconductor
Source: Royal Society of Chemistry journal article supplement (doi:10.1039/c8tc05740k), 2019-01-01
Supplement: c8tc05740k1.pdf [file c8tc05740k1.pdf]

## Supporting Information

### Improving Device Performance of n-type Organic Field-Effect Transistors via Doping with p-type Organic Semiconductor

Shuqiong Lan,<sup>a</sup> Yujie Yan,<sup>a</sup> Huihuang Yang,<sup>a</sup> Guocheng Zhang,<sup>a</sup> Yun Ye,<sup>a</sup> Fushan Li,<sup>a</sup> Huipeng Chen,<sup>a\*</sup> Tailiang Guo<sup>a</sup>

a)

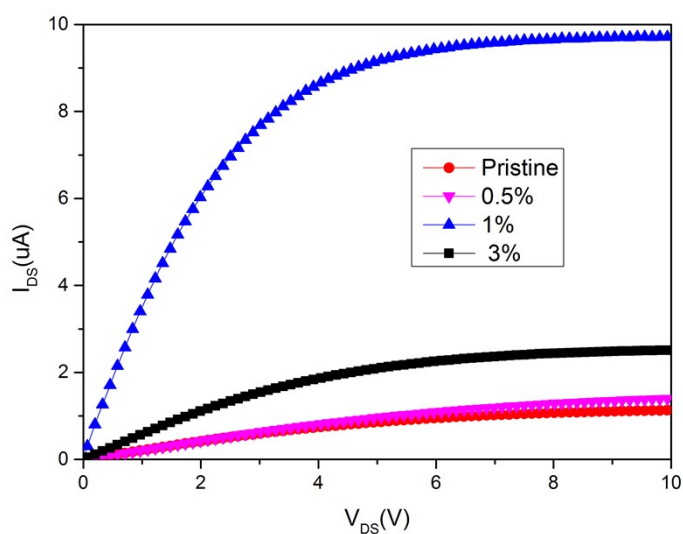

b)

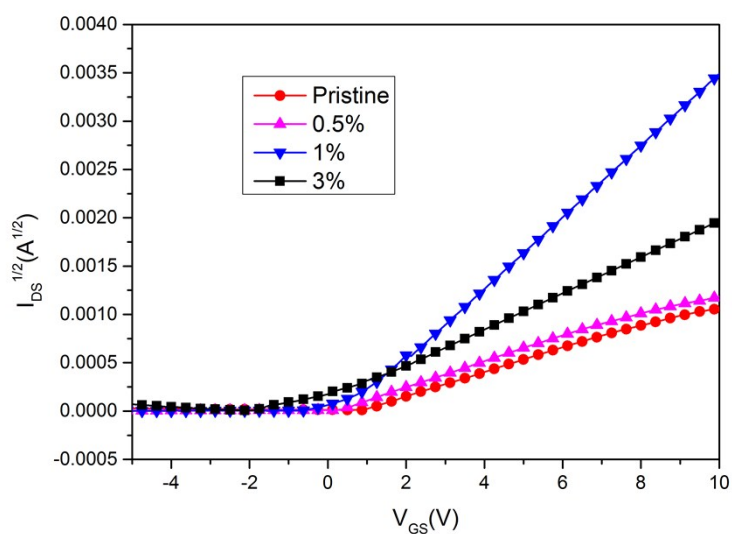

**Figure S1** a) Output curve, b)  $I_d^{1/2}$  vs  $V_{GS}$  plot of the pristine and blend OFETs.

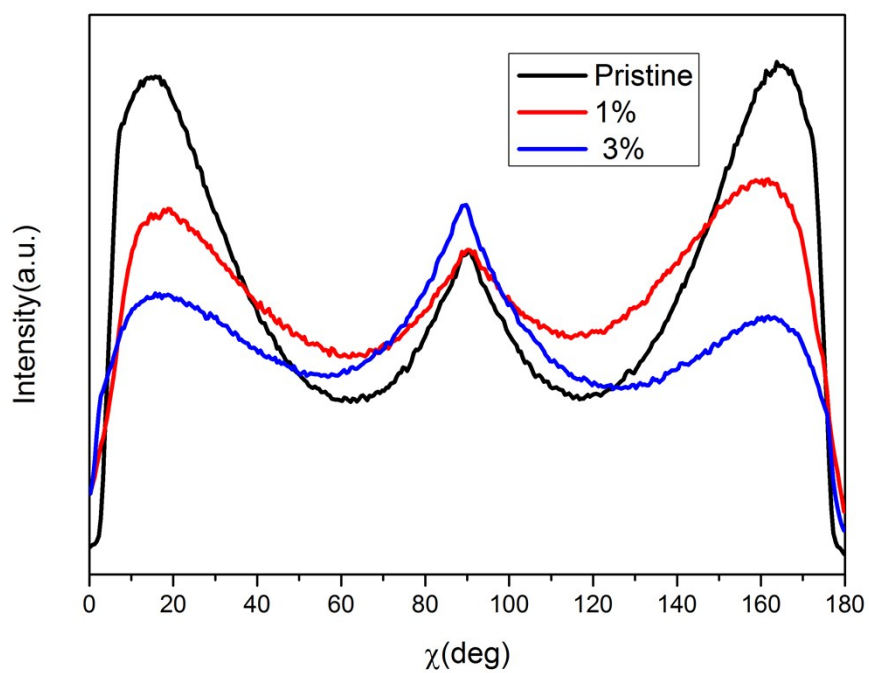

**Figure S2** Pole figures extracted from the (100) lamellar diffraction for the pristine film and blend films.

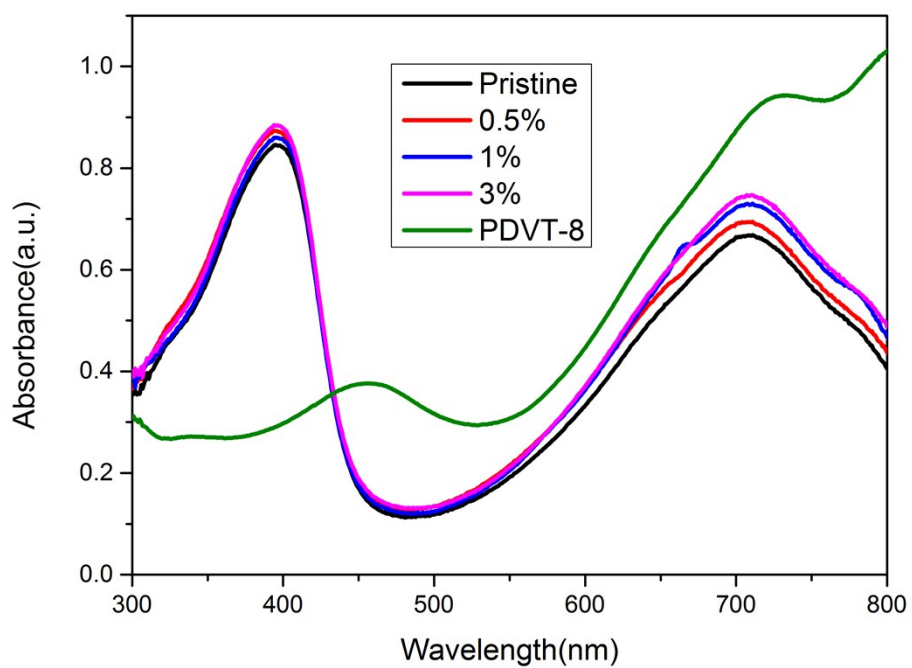

**Figure S3** Normalized UV-vis absorption spectra of pristine N2200 film, PDVT-8 films and PDVT-8 blended N2200.

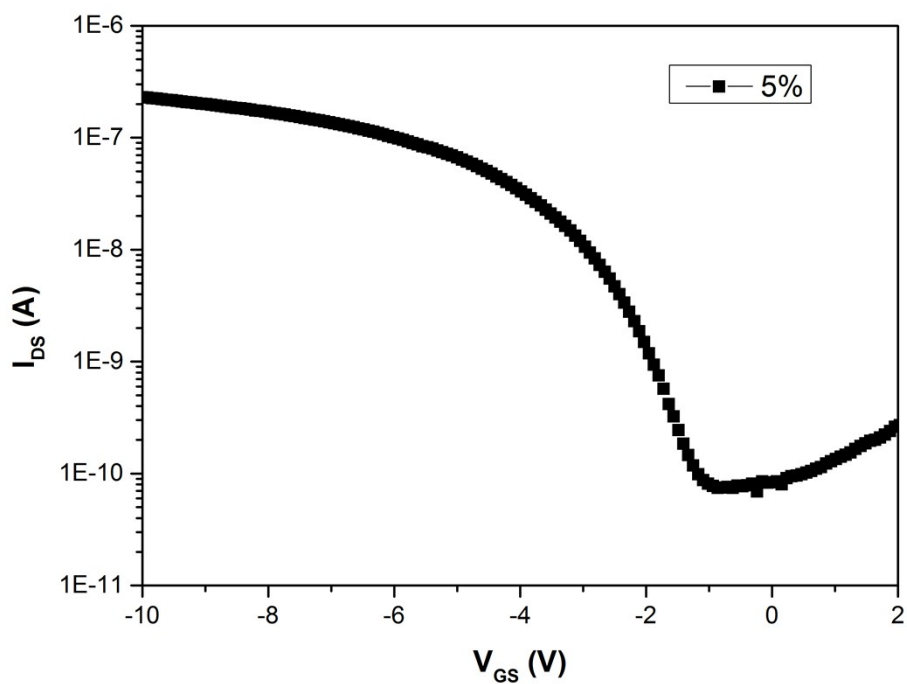

**Figure S4** P-type transfer characteristic of the device based on N2200 containing 5% PVDT-8.

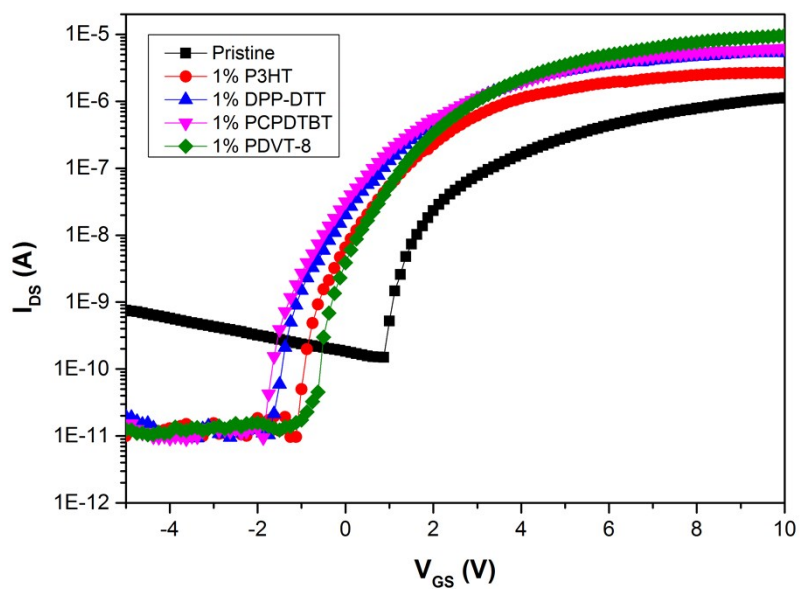

**Figure S5** Transfer characteristics of pristine N2200 and its blends with P3HT, DPP-DTT, PCPDTBT and PDVT-8.

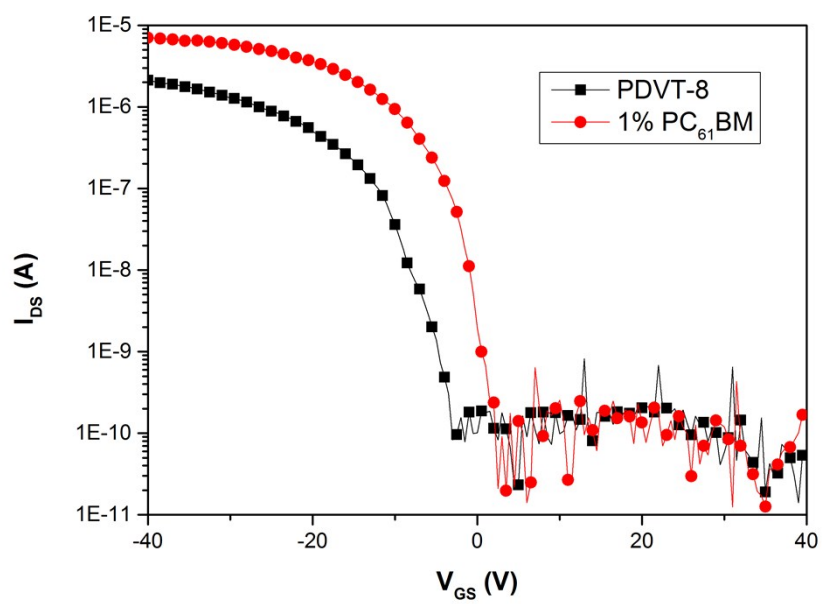

**Figure S6** Transfer characteristics of pristine P-type polymer PDVT-8 and its blends with 1% PCBM.
